# Supplementary material for: Importance of fluorescence lifetimes for efficient indoline dyes in dye-sensitized solar cells
Source: Royal Society of Chemistry journal article supplement (doi:10.1039/c5ra09455k), 2015-01-01
Supplement: c5ra09455k1.pdf [file c5ra09455k1.pdf]

## Electronic Supplementary Information

### Proposal of fluorescence lifetime in chloroform as a convenient parameter for electron injection of efficient indoline dyes in dye-sensitized solar cell

Masaki Matsui<sup>a,\*</sup>, Ryota Aoki<sup>a</sup>, Daichi Nishiwaki<sup>a</sup>, Yasuhiro Kubota<sup>a</sup>, Kazumasa Funabiki<sup>a</sup>, Jiye Jin<sup>b</sup>, Tsukasa Yoshida<sup>c</sup>, Shinji Higashijima<sup>d</sup>, Hidetoshi Miura<sup>d</sup>

<sup>a</sup>Department of Chemistry and Biomolecular Science,  
Faculty of Engineering, Gifu University, Yanagido, Gifu 501-1193, Japan

<sup>b</sup>Department of Chemistry, Faculty of Science, Shinshu University,  
3-1-1 Asahi, Matsumoto, Nagano 390-8621, Japan

<sup>c</sup>Research Center of Organic Electronics Yamagata University, 4-3-16, Jonan,  
Yonezawa, Yamagata 992-8510, Japan

<sup>d</sup>Chemicrea Inc., 1-133 Ohtsurugi, Shimogawa, Izumi-machi, Iwaki, Fukushima  
971-8183, Japan

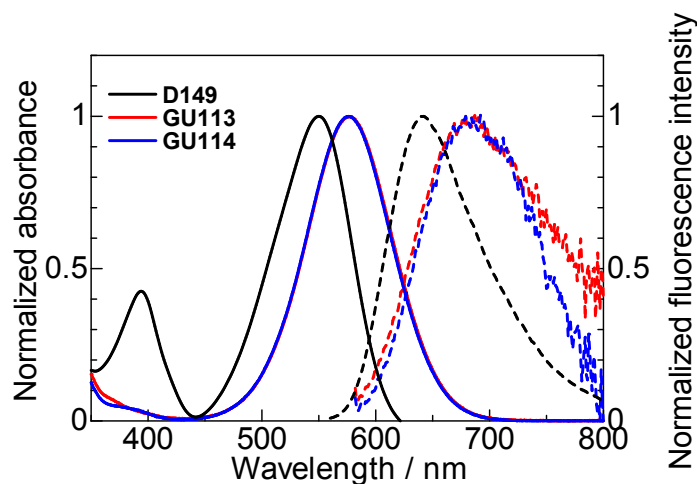

Figure S1. Normalized UV-vis absorption and fluorescence spectra of **GU113**, **GU114**, and **D149** measured on  $1.0 \times 10^{-5} \text{ mol dm}^{-3}$  at  $25^\circ\text{C}$ . Solid and dotted lines represent UV-vis absorption and fluorescence spectra,

respectively.

#### *Synthesis of pyridone ethyl acetates 4*

To ethanol (2 mL) were added glycine hydrochloric acid ethyl ester **3** (2.80 g, 20.0 mmol) and triethylamine (3.00 g, 29.7 mmol) and stirred for 5 min at room temperature, Then, to the mixture were added ethyl alkanoylacetate **1** (20.0 mmol), ethyl cyanoacetate **2** (2.22 g, 20.0 mmol), and piperidine (0.522 g, 6.13 mmol) and refluxed for 9 h. After the reaction was completed, the mixture was concentrated and water (4 mL) was added. This mixture was added to 10% aqueous hydrochloric acid (30 mL) at 0°C. In the case of **4a**, the resulting viscous compound was recrystallized from ethyl acetate. In the case of **4b**, the resulting viscous compound, obtained in a 10% yield, was used to next step without further purification.

**4a:** Yield 8.5%; mp 178-180°C; IR (KBr)  $\nu = 1223, 1497, 1616, 1740, 2218$ ;  $^1\text{H NMR}$  (DMSO- $d_6$ )  $\delta = 1.20$  (t,  $J = 7.1$  Hz, 3H), 2.23 (s, 3H), 4.13 (q,  $J = 7.1$  Hz, 2H), 4.66 (s, 3H), 5.59 (s, 1H);  $^{13}\text{C NMR}$  (DMSO- $d_6$ )  $\delta = 14.0, 20.7, 39.9, 61.1, 86.6, 92.9, 117.7, 158.4, 160.6, 160.7, 167.8$ ; FABMS (NBA)  $m/z$  237 (MH<sup>+</sup>); Anal. Found: 55.90; H, 5.15; N, 11.94%. Calcd for C<sub>11</sub>H<sub>12</sub>N<sub>2</sub>O<sub>4</sub>: C, 55.93; H, 5.12; N, 11.86%.

#### *Synthesis of pyridine acetic acids 5*

Compound **4** (400 mg, 1.69 mmol) was refluxed in acetic acid-conc. hydrochloric acid mixed solvent (2:1, 3 mL) for 3 h. After the reaction was completed, the resulting powder was washed with cold water and dried.

**5a:** Yield 44%; mp 195-197°C; IR (KBr)  $\nu = 1535, 1670, 2222, 2970$ ;  $^1\text{H NMR}$  (CDCl<sub>3</sub>)  $\delta = 2.23$  (s, 3H), 4.58 (s, 2H), 6.00 (s, 1H);  $^{13}\text{C NMR}$  (CDCl<sub>3</sub>)  $\delta = 20.6, 41.6, 86.9, 92.5, 117.6, 158.3, 160.4, 160.5, 169.0$ ; FABMS (NBA)  $m/z$  209 (MH<sup>+</sup>); Anal. Found: 52.05; H, 4.03; N, 13.24%. Calcd for C<sub>9</sub>H<sub>8</sub>N<sub>2</sub>O<sub>4</sub>: C, 51.93; H, 3.87; N, 13.46%.

**5b:** Yield 50.9%; mp 203-205°C; IR (KBr)  $\nu$  = 1539, 1754, 2222, 2936;  $^1\text{H}$  NMR (DMSO- $d_6$ )  $\delta$  = 0.91 (t,  $J$  = 7.2 Hz, 3H), 1.34 (quint,  $J$  = 7.2 Hz, 2H), 1.54 (q,  $J$  = 7.2 Hz, 2H), 2.51 (t,  $J$  = 7.2 Hz, 2H), 4.58 (s, 2H), 5.58 (s, 1H);  $^{13}\text{C}$  NMR ((DMSO- $d_6$ )  $\delta$  = 11.4, 19.6, 28.7, 31.7, 39.5, 84.2, 89.5, 115.4, 158.5, 158.6, 160.1, 166.9; FABMS (NBA)  $m/z$  251 (MH $^+$ ); Anal. Found: C, 57.84; H, 5.69; N, 11.33%. Calcd for C<sub>12</sub>H<sub>14</sub>N<sub>2</sub>O<sub>4</sub>: C, 57.59, H, 5.64; N, 11.19%.

### Synthesis of **GU113** and **GU114**

To absolute ethanol (10 mL) were added **5** (0.70 mmol) and **6** (400 mg, 0.86 mmol) and stirred at room temperature for 1 day. After the reaction was completed, the solvent was removed *in vacuo*. The product was dissolved in dichloromethane (6 mL) and poured into hexane (100 mL). The resulting precipitate was collected by centrifugal separation and dried *in vacuo*.

**GU113:** Yield 82.2%; mp 206-208°C; IR (KBr)  $\nu$  = 1454, 1651, 2222;  $^1\text{H}$  NMR (DMSO- $d_6$ )  $\delta$  = 0.48-0.57 (m, 4H), 0.62 (t,  $J$  = 7.2 Hz, 3H), 0.67 (t,  $J$  = 7.2 Hz, 3H), 0.99-1.08 (m, 4H), 1.39-1.43 (m, 1H), 1.66-1.80 (m, 4H), 1.97-2.12 (m, 5H), 2.61 (s, 3H), 3.88 (t,  $J$  = 8.6 Hz, 1H), 4.54 (s, 2H), 5.32 (t,  $J$  = 8.6 Hz, 1H), 6.80 (d,  $J$  = 8.6 Hz, 1H), 7.31-7.36 (m, 2H), 7.43-7.46 (m, 2H), 7.55 (s, 1H), 7.82 (d,  $J$  = 6.9 Hz, 1H), 7.90 (d,  $J$  = 8.3 Hz, 1H), 7.93 (s, 1H), 8.11 (d,  $J$  = 8.6 Hz, 1H), 8.37 (s, 1H); Exact FABMS (NBA)  $m/z$  (MH $^+$ ): 654.3342. Calcd for C<sub>42</sub>H<sub>45</sub>N<sub>3</sub>O<sub>4</sub>: 654.3332.

**GU114:** Yield 88.1%; mp 206-208°C; IR (KBr)  $\nu$  = 1442, 1651, 2218;  $^1\text{H}$  NMR (DMSO- $d_6$ )  $\delta$  = 0.48-0.58 (m, 4H), 0.62 (t,  $J$  = 7.2 Hz, 3H), 0.67 (t,  $J$  = 7.2 Hz, 3H), 0.94 (t,  $J$  = 7.3 Hz, 3H), 0.98-1.08 (m, 4H), 1.38-1.48 (m, 3H), 1.57 (quint,  $J$  = 7.3 Hz, 2H), 1.65-1.80 (m, 4H), 1.97-2.12 (m, 5H), 2.66-3.08 (m, 2H), 3.89 (t,  $J$  = 8.9 Hz, 1H), 4.53 (s, 2H), 5.32 (t,  $J$  = 8.9 Hz, 1H), 6.80 (d,  $J$  = 8.6 Hz, 1H), 7.31-7.36 (m, 2H), 7.43-7.46 (m, 2H), 7.56 (s, 1H), 7.82 (d,  $J$  = 6.8 Hz, 1H), 7.90 (d,  $J$  = 8.3 Hz, 1H), 7.91 (s, 1H), 8.11 (d,  $J$  = 8.6 Hz, 1H), 8.40 (s, 1H); Exact FABMS (NBA)  $m/z$  (MH $^+$ ): 696.3831.

Calcd for  $C_{45}H_{51}N_3O_4$ : 696.3801.
